# Supplementary material for: The effects of 2,3,7,8-tetrachlorodibenzo-p-dioxin (TCDD) on the transcriptome of aryl hydrocarbon receptor (AhR) knock-down porcine granulosa cells
Source: PeerJ. 2020 Jan 22;8:e8371. doi: 10.7717/peerj.8371 (PMC6982409; doi:10.7717/peerj.8371)
Supplement: Table S1 [file peerj-08-8371-s002.xlsx]

## Sheet: Table S1
Supplemental Table 1. The sequences of siRNAs used to knock-down porcine aryl hydrocarbon receptor (AhR) gene
	Target Gene	siRNA name	Sense/Antisense strand	siRNA sequence (5’ - 3’)
	AhR	anti-AhR 1	Sense	GCAAGAUGAGUCUGUUUAUdTdT
			Antisense	AUAAACAGACUCAUCUUGCdTdT
		anti-AhR 2	Sense	CUUUACACCUACUGGUUGUdTdT
			Antisense	ACAACCAGUAGGUGUAAAGdTdT
		anti-AhR 3	Sense	GCUGUUCUCUAUGAGAUAAdTdT
			Antisense	UUAUCUCAUAGAGAACAGCdTdT
