# Supplementary material for: The effects of 2,3,7,8-tetrachlorodibenzo-p-dioxin (TCDD) on the transcriptome of aryl hydrocarbon receptor (AhR) knock-down porcine granulosa cells
Source: PeerJ. 2020 Jan 22;8:e8371. doi: 10.7717/peerj.8371 (PMC6982409; doi:10.7717/peerj.8371)
Supplement: Table S2 [file peerj-08-8371-s003.xlsx]

## Sheet: Table S2
Supplemental Table 2. Primers and probes used for real-time PCR
	Gene Description	Gene symbol	Assay ID*
	Glyceraldehyde 3-phosphate dehydrogenase	GAPDH	Ss03373286_u1
	β-actin	β-actin	Ss03376563_uH
	Aryl hydrocarbon receptor	AhR	AIAAA6T
	CXC chemokine receptor type 4	CXCR4	Ss03392297_s1
	Cytochrome P450, family 26, subfamily A, member 1	CYP26A1	Ss03374152_g1
	Nuclear receptor subfamily 4, group A, member 2	NR4A2	Ss00443062_g1
	*Thermofisher Scientific
