# Supplementary material for: The effects of 2,3,7,8-tetrachlorodibenzo-p-dioxin (TCDD) on the transcriptome of aryl hydrocarbon receptor (AhR) knock-down porcine granulosa cells
Source: PeerJ. 2020 Jan 22;8:e8371. doi: 10.7717/peerj.8371 (PMC6982409; doi:10.7717/peerj.8371)
Supplement: Table S3 [file peerj-08-8371-s004.xlsx]

## Sheet: Table S3
Supplemental Table 3. Summary of datasets used in the study
Total number of	Cs 3a	TCDD 3a	Cs 3b	TCDD 3b	Cs 12a	TCDD 12a	Cs 12b	TCDD 12b	Cs 24a	TCDD 24a	Cs 24b	TCDD 24b
reads before QC	72,297,110	51,939,838	64,969,368	51,640,270	54,546,280	72,646,340	68,017,328	61,554,100	73,081,022	79,513,446	62,201,010	67,790,534
reads after QC	69,336,626	49,555,434	62,605,880	48,472,356	51,356,836	69,382,492	65,619,002	59,495,958	70,069,740	76,881,678	60,019,884	63,938,514
mapped reads	64,050,220	45,765,282	57,709,808	44,487,598	47,240,546	64,054,228	60,487,520	54,538,868	64,193,150	69,454,128	54,812,348	58,639,806
uniquely mapped reads	61,496,948	44,036,108	54,742,350	42,880,816	45,518,158	62,128,632	57,152,092	53,064,836	62,200,706	67,543,458	52,968,376	56,748,366
expressed genes	15,592	15,100	15,502	15,157	15,265	15,555	15,426	15,395	15,872	15,913	15,704	15,737
QC: quality control
Cs 3-24: untreated AhR knock-down porcine granulosa cells (control) cultured for 3, 12 or 24 h
TCDD 3-24: AhR knock-down porcine granulosa cells treated with TCDD (100 nM) for 3, 12 or 24 h
a, b: biological replicates
