# Supplementary material for: The effects of 2,3,7,8-tetrachlorodibenzo-p-dioxin (TCDD) on the transcriptome of aryl hydrocarbon receptor (AhR) knock-down porcine granulosa cells
Source: PeerJ. 2020 Jan 22;8:e8371. doi: 10.7717/peerj.8371 (PMC6982409; doi:10.7717/peerj.8371)
Supplement: Table S5 [file peerj-08-8371-s005.xlsx]

## Sheet: Table S4
Supplemental Table 4. Pearson's correlation coefficients between two biological replicates of TCDD-treated and untreated AhR knock-down porcine granulosa cells cultured for 3, 12 and 24 hours
		Cs 3a	TCDD 3a	Cs 3b	TCDD 3b	Cs 12a	TCDD 12a	Cs 12b	TCDD 12b	Cs 24a	TCDD 24a	Cs 24b	TCDD 24b
	Cs 3a	1	0.991053	0.997414	0.994234	0.990191	0.988976	0.982722	0.989099	0.997099	0.995827	0.996764	0.99048
	TCDD 3a	0.991053	1	0.993348	0.999283	0.995916	0.994992	0.993805	0.99572	0.985802	0.983743	0.98257	0.99063
	Cs 3b	0.997414	0.993348	1	0.994907	0.990569	0.987988	0.990978	0.986963	0.991899	0.989258	0.991538	0.987401
	TCDD 3b	0.994234	0.999283	0.994907	1	0.997086	0.996522	0.992265	0.997224	0.99041	0.988695	0.987713	0.993896
	Cs 12a	0.990191	0.995916	0.990569	0.997086	1	0.99921	0.993223	0.996862	0.988776	0.985502	0.986668	0.997875
	TCDD 12a	0.988976	0.994992	0.987988	0.996522	0.99921	1	0.989669	0.997375	0.987675	0.984604	0.985694	0.998227
	Cs 12b	0.982722	0.993805	0.990978	0.992265	0.993223	0.989669	1	0.986057	0.976708	0.971494	0.974772	0.985462
	TCDD 12b	0.989099	0.99572	0.986963	0.997224	0.996862	0.997375	0.986057	1	0.988964	0.988403	0.984894	0.995747
	Cs 24a	0.997099	0.985802	0.991899	0.99041	0.988776	0.987675	0.976708	0.988964	1	0.999007	0.999177	0.991865
	TCDD 24a	0.995827	0.983743	0.989258	0.988695	0.985502	0.984604	0.971494	0.988403	0.999007	1	0.997135	0.988987
	Cs 24b	0.996764	0.98257	0.991538	0.987713	0.986668	0.985694	0.974772	0.984894	0.999177	0.997135	1	0.990488
	TCDD 24b	0.99048	0.99063	0.987401	0.993896	0.997875	0.998227	0.985462	0.995747	0.991865	0.988987	0.990488	1
All values are statistically significant (P < 0.0001).
Cs 3-24: untreated AhR knock-down porcine granulosa cells (control) cultured for 3, 12 or 24 h
TCDD 3-24: AhR knock-down porcine granulosa cells treated with TCDD (100 nM) for 3, 12 or 24 h
a, b: biological replicates
