# Supplementary material for: The effects of 2,3,7,8-tetrachlorodibenzo-p-dioxin (TCDD) on the transcriptome of aryl hydrocarbon receptor (AhR) knock-down porcine granulosa cells
Source: PeerJ. 2020 Jan 22;8:e8371. doi: 10.7717/peerj.8371 (PMC6982409; doi:10.7717/peerj.8371)
Supplement: Table S5 [file peerj-08-8371-s006.xlsx]

## Sheet: Table S5
Supplemental Table 5. Differentially expressed genes (DEGs) identified in AhR knock-down porcine granulosa cells after 3, 12 or 24 hours of 2,3,7,8-tetrachlorodibenzo-p-dioxin (TCDD) treatment
Number	Gene Ensembl ID	log2 fold change			Gene Symbol	Gene Description
		3 h	12 h	24 h
1	ENSSSCG00000010475	2.01673	-0.404254	0.0782431	CYP26A1	cytochrome P450 family 26 subfamily A member 1												P-adjusted<0.05
2	ENSSSCG00000040652	1.789	-0.0240681	0.0861345	CBLN1	cerebellin-1 precursor
3	ENSSSCG00000000738	1.62543	0.0581241	0.757576	RHNO1	RAD9-HUS1-RAD1 interacting nuclear orphan 1
4	ENSSSCG00000040678	1.5697	-0.0513015	0.569588	TYMS	thymidylate synthetase
5	ENSSSCG00000015961	1.54786	-0.0937059	0.303975	CDCA7	cell division cycle associated 7
6	ENSSSCG00000031741	1.51278	0.00279173	0.48494	RRM2	ribonucleotide reductase regulatory subunit M2
7	ENSSSCG00000000950	1.49332	0.00426455	0.374888	E2F7	E2F transcription factor 7
8	ENSSSCG00000003708	1.48738	0.0898222	0.547999	ANKRD29	ankyrin repeat domain 29
9	ENSSSCG00000009671	1.46006	-0.00207034	0.803847	PBK	PDZ binding kinase
10	ENSSSCG00000008873	1.43598	-0.786086	-0.101389	FAM198B	family with sequence similarity 198 member B
11	ENSSSCG00000037120	1.42868	0.0936259	0.472758	TK1	thymidine kinase 1
12	ENSSSCG00000034943	1.40275	-0.500382	0.435903	GDF6	growth differentiation factor 6
13	ENSSSCG00000004554	1.3831	0.0106193	0.471764	PCLAF	Sus scrofa PCNA-associated factor (LOC100514810), mRNA
14	ENSSSCG00000038543	1.36447	-0.0511667	0.743479	CENPA	centromere protein A
15	ENSSSCG00000007351	1.3605	0.0160301	0.764845	FAM83D	family with sequence similarity 83 member D
16	ENSSSCG00000027872	1.35921	-0.185031	0.660523	MYBL1	MYB proto-oncogene like 1
17	ENSSSCG00000014248	1.34946	-0.0153559	0.433669	LMNB1	lamin B1
18	ENSSSCG00000005056	1.33373	0.0154307	0.754426	DLGAP5	DLG associated protein 5
19	ENSSSCG00000007268	1.33303	0.069525	0.586055	E2F1	E2F transcription factor 1
20	ENSSSCG00000033443	1.33239	-0.237908	0.518696	DEPDC1	DEP domain containing 1
21	ENSSSCG00000013352	1.31657	-0.0153693	0.48979	E2F8	E2F transcription factor 8
22	ENSSSCG00000006810	1.31243	-0.0293775	0.450505	KCNC4	potassium voltage-gated channel subfamily C member 4
23	ENSSSCG00000031648	1.31158	-0.249908	0.487558	WISP2	WNT1 inducible signaling pathway protein 2
24	ENSSSCG00000012557	1.30757	-0.0064722	0.663138	NUP62CL	nucleoporin 62 C-terminal like
25	ENSSSCG00000035069	1.30731	0.143478	0.551446	CHSY3	chondroitin sulfate synthase 3
26	ENSSSCG00000023934	1.3067	-0.488782	-0.15184	KCNIP4	potassium voltage-gated channel interacting protein 4
27	ENSSSCG00000023639	1.30457	-0.176009	0.296756	NRM	nurim
28	ENSSSCG00000039546	1.3014	-0.257425	0.699475	KNTC1	kinetochore associated 1
29	ENSSSCG00000016932	1.30016	-0.0284516	0.882697	DEPDC1B	DEP domain containing 1B
30	ENSSSCG00000010486	1.29957	0.065206	0.475133	HELLS	helicase, lymphoid specific
31	ENSSSCG00000028924	1.29262	0.14651	0.473944	AURKB	aurora kinase B
32	ENSSSCG00000012685	1.26619	-0.129872	0.487326	FAM122B	family with sequence similarity 122B
33	ENSSSCG00000013772	1.24639	0.109099	0.497206	ASF1B	histone chaperone ASF1B
34	ENSSSCG00000017893	1.24342	0.110292	0.785447	PIMREG	PICALM interacting mitotic regulator
35	ENSSSCG00000009093	1.24302	-0.00325628	0.583909	BBS7	Bardet-Biedl syndrome 7
36	ENSSSCG00000029264	1.24298	-0.00391709	0.348711	PKMYT1	protein kinase, membrane associated tyrosine/threonine 1
37	ENSSSCG00000029715	1.23977	-0.245926	0.252776	OLFM1	olfactomedin 1
38	ENSSSCG00000016313	1.23809	-0.0952018	0.58299	HJURP	Holliday junction recognition protein
39	ENSSSCG00000031713	1.22693	0.206864	0.262115	H2AFY2	H2A histone family member Y2
40	ENSSSCG00000004518	1.22638	0.0178435	0.465968	SKA1	spindle and kinetochore associated complex subunit 1
41	ENSSSCG00000001392	1.22228	0.229518	0.271264	TCF19	transcription factor 19
42	ENSSSCG00000036613	1.22013	0.00439161	0.758231	POLQ	DNA polymerase theta
43	ENSSSCG00000022149	1.21714	-0.232511	0.436956	RMI2	RecQ mediated genome instability 2
44	ENSSSCG00000034913	1.21459	-0.0725374	0.442201	GINS1	GINS complex subunit 1
45	ENSSSCG00000010214	1.2118	0.0344096	0.517814	CDK1	cyclin-dependent kinase 1
46	ENSSSCG00000032909	1.21027	0.00805226	0.697572	CDCA8	cell division cycle associated 8
47	ENSSSCG00000010122	1.2093	0.0248596	0.397982	CDC45	cell division cycle 45
48	ENSSSCG00000039946	1.19628	0.186936	0.658764	CD34	CD34 molecule
49	ENSSSCG00000040397	1.18939	0.258257	0.951115	COLEC12	collectin subfamily member 12
50	ENSSSCG00000003403	1.18513	-0.0359899	0.379459	CENPS	centromere protein S
51	ENSSSCG00000007927	1.18423	-0.276984	0.644923	PPL	periplakin
52	ENSSSCG00000004466	1.18198	-0.0757996	0.629404	TTK	TTK protein kinase
53	ENSSSCG00000017022	1.18138	-0.0624455	0.643759	HMMR	hyaluronan mediated motility receptor
54	ENSSSCG00000000683	1.1803	-0.00697348	0.693317	CDCA3	cell division cycle associated 3
55	ENSSSCG00000008259	1.17784	0.0932012	1.01819	LRRTM4	leucine rich repeat transmembrane neuronal 4
56	ENSSSCG00000029753	1.1778	0.103684	0.168017	CYTIP	cytohesin 1 interacting protein
57	ENSSSCG00000004746	1.17779	-0.196403	0.322803	ITPKA	inositol-trisphosphate 3-kinase A
58	ENSSSCG00000010865	1.17635	-0.0251988	0.390445	EXO1	exonuclease 1
59	ENSSSCG00000006273	1.17153	0.0331455	0.26201	MCM4	minichromosome maintenance complex component 4
60	ENSSSCG00000013517	1.17005	-0.0773965	0.424472	UHRF1	ubiquitin like with PHD and ring finger domains 1
61	ENSSSCG00000010240	1.16426	-0.138416	0.35956	DNA2	DNA replication helicase/nuclease 2
62	ENSSSCG00000017473	1.16295	-0.150113	0.497844	TOP2A	DNA topoisomerase 2-alpha
63	ENSSSCG00000032315	1.16172	0.0749209	0.397046	XRCC2	X-ray repair cross complementing 2
64	ENSSSCG00000000002	1.1615	0.12203	0.425032	GTSE1	G2 and S-phase expressed 1
65	ENSSSCG00000010471	1.16009	-0.122662	0.661452	KIF11	kinesin family member 11
66	ENSSSCG00000013043	1.15917	0.0357172	0.759785	MACROD1	Sus scrofa MACRO domain containing 1 (MACROD1), mRNA
67	ENSSSCG00000029326	1.15726	0.0228782	0.775894	CCNB1	G2/mitotic-specific cyclin-B1
68	ENSSSCG00000039216	1.15563	0.0387642	0.43068	CENPN	centromere protein N
69	ENSSSCG00000003949	1.15041	0.0373111	0.736385	CDC20	cell division cycle 20
70	ENSSSCG00000007463	1.14794	-0.156507	0.572512	PTGIS	prostaglandin I2 synthase
71	ENSSSCG00000025965	1.14591	0.0261595	0.665921	SPDL1	spindle apparatus coiled-coil protein 1
72	ENSSSCG00000009004	1.14336	-0.148038	0.389153	SFRP2	secreted frizzled-related protein 2 precursor
73	ENSSSCG00000002980	1.14168	-0.420288	-0.425027	AWN	sperm associated AWN protein
74	ENSSSCG00000007541	1.14051	0.0573059	0.526053	PDGFA	platelet derived growth factor subunit A
75	ENSSSCG00000010461	1.13875	0.139398	0.306589	ANKRD1	ankyrin repeat domain 1
76	ENSSSCG00000012307	1.13826	-0.142006	0.395203	CCNB3	cyclin B3
77	ENSSSCG00000010447	1.13671	-0.322978	-0.0713742	ACTA2	actin, alpha 2, smooth muscle, aorta
78	ENSSSCG00000009704	1.13395	0.0394756	0.567232	HMGB2	high mobility group box 2
79	ENSSSCG00000033444	1.13386	0.000681741	0.550524	SPC24	SPC24, NDC80 kinetochore complex component
80	ENSSSCG00000028169	1.12904	0.0270827	0.5	NCAPG2	non-SMC condensin II complex subunit G2
81	ENSSSCG00000014898	1.12596	0.0136426	0.525327	DDIAS	DNA damage induced apoptosis suppressor
82	ENSSSCG00000011217	1.12555	0.0611613	0.923151	NEK10	NIMA related kinase 10
83	ENSSSCG00000038487	1.12465	-0.112752	0.356345	TMPO	thymopoietin
84	ENSSSCG00000004136	1.12051	0.0445955	0.531888	AIG1	androgen induced 1
85	ENSSSCG00000026302	1.12017	-0.080459	0.622216	MKI67	marker of proliferation Ki-67
86	ENSSSCG00000037016	1.11723	0.0840952	0.386035	ID1	DNA-binding protein inhibitor ID-1
87	ENSSSCG00000011731	1.11268	-0.121099	0.524127	SMC4	structural maintenance of chromosomes 4
88	ENSSSCG00000025488	1.10807	0.052279	0.334033	MCM3	minichromosome maintenance complex component 3
89	ENSSSCG00000013008	1.10744	-0.0666618	0.405181	CDCA5	cell division cycle associated 5
90	ENSSSCG00000000722	1.10722	-0.0480107	0.223637	RAD51AP1	RAD51 associated protein 1
91	ENSSSCG00000000874	1.10705	-0.277034	0.575333	GAS2L3	growth arrest specific 2 like 3
92	ENSSSCG00000011624	1.10674	-0.0082023	0.214909	MCM2	minichromosome maintenance complex component 2
93	ENSSSCG00000011207	1.10361	-0.0204583	0.650904	SGO1	shugoshin 1
94	ENSSSCG00000009448	1.09923	-0.126596	0.647009	DIAPH3	diaphanous related formin 3
95	ENSSSCG00000012558	1.09908	0.00536333	1.1679	PIH1D3	PIH1 domain containing 3
96	ENSSSCG00000003555	1.09846	0.167946	0.666388	HMGN2	Non-histone chromosomal protein HMG-17
97	ENSSSCG00000026748	1.09836	-0.0379531	0.54254	PLK1	polo like kinase 1
98	ENSSSCG00000021902	1.0934	0.337945	1.0078	GABRP	gamma-aminobutyric acid type A receptor pi subunit
99	ENSSSCG00000016658	1.09245	-0.198057	0.713748	ANLN	anillin actin binding protein
100	ENSSSCG00000034522	1.08843	0.0570657	0.43743	TRIP13	thyroid hormone receptor interactor 13
101	ENSSSCG00000004548	1.0859	-0.0151317	0.768524	PIF1	PIF1 5'-to-3' DNA helicase
102	ENSSSCG00000034229	1.08281	0.0883233	0.761002	MIS18A	MIS18 kinetochore protein A
103	ENSSSCG00000003876	1.08276	-0.0371799	0.437474	CDKN2C	cyclin dependent kinase inhibitor 2C
104	ENSSSCG00000004077	1.08215	-0.0165775	0.197693	FBXO5	F-box protein 5
105	ENSSSCG00000037697	1.07989	-0.338668	0.317653	MGP	Matrix Gla protein
106	ENSSSCG00000036256	1.07981	0.0734646	0.455712	MAD2L1	mitotic arrest deficient 2 like 1
107	ENSSSCG00000028695	1.0788	0.0751478	0.177259	TMSB15A	thymosin beta 15a
108	ENSSSCG00000023296	1.07823	-0.117996	0.754514	CENPE	centromere protein E
109	ENSSSCG00000026404	1.0761	-0.137317	0.717499	SERTAD4	SERTA domain containing 4
110	ENSSSCG00000012724	1.07594	-0.822092	-0.436202	SLITRK2	SLIT and NTRK like family member 2
111	ENSSSCG00000040486	1.07263	0.0630969	0.798031	BIRC5	baculoviral IAP repeat containing 5
112	ENSSSCG00000015756	1.07154	0.110945	0.508541	XKR5	XK related 5
113	ENSSSCG00000015600	1.06073	-0.0372273	0.379798	DTL	denticleless E3 ubiquitin protein ligase homolog
114	ENSSSCG00000000739	1.06042	-0.104597	0.363451	FOXM1	forkhead box M1
115	ENSSSCG00000016992	1.05552	-0.336656	0.497187	NEURL1B	neuralized E3 ubiquitin protein ligase 1B
116	ENSSSCG00000015604	1.05535	0.00921668	0.683897	NEK2	NIMA related kinase 2
117	ENSSSCG00000033051	1.04891	-0.138642	0.422441	POLE	DNA polymerase epsilon, catalytic subunit
118	ENSSSCG00000004782	1.04811	-0.0955176	0.741879	BUB1B	BUB1 mitotic checkpoint serine/threonine kinase B
119	ENSSSCG00000004520	1.04334	-0.0198683	0.305066	MAPK4	mitogen-activated protein kinase 4
120	ENSSSCG00000015396	1.04132	-0.417886	0.032682	SEMA3D	semaphorin 3D
121	ENSSSCG00000026257	1.03898	0.0720657	0.584574	STMN1	stathmin 1
122	ENSSSCG00000008747	1.03661	-0.0398493	0.553792	NCAPG	non-SMC condensin I complex subunit G
123	ENSSSCG00000032279	1.03565	0.0735497	0.683169	SAPCD2	suppressor APC domain containing 2
124	ENSSSCG00000004588	1.03426	0.0332645	0.43714	CCNB2	cyclin B2
125	ENSSSCG00000015496	1.03235	-0.0159623	0.614487	CENPL	centromere protein L
126	ENSSSCG00000011309	1.0306	-0.105987	0.642495	KIF15	kinesin family member 15
127	ENSSSCG00000036080	1.03027	0.151252	0.537076	LOC110261483	histone H2A type 1
128	ENSSSCG00000008613	1.03001	-0.0624794	0.521531	GEN1	GEN1, Holliday junction 5' flap endonuclease
129	ENSSSCG00000032180	1.02858	0.0359719	0.292537	MCM7	minichromosome maintenance complex component 7
130	ENSSSCG00000012126	1.02771	-0.279238	0.392708	GPM6B	glycoprotein M6B
131	ENSSSCG00000026339	1.02731	0.0659908	0.567127	FAM25A	family with sequence similarity 25 member
132	ENSSSCG00000012377	1.02551	-0.0347196	0.735721	KIF4A	kinesin family member 4A
133	ENSSSCG00000016718	1.0238	0.0491157	0.800089	NPY	pro-neuropeptide Y precursor
134	ENSSSCG00000016378	1.02268	-0.156141	0.290687	PASK	PAS domain containing serine/threonine kinase
135	ENSSSCG00000010878	1.02213	-0.098997	-0.00859226	EFCAB2	EF-hand calcium binding domain 2
136	ENSSSCG00000032931	1.02108	-0.232045	0.0633614	ENSSSCG00000032931
137	ENSSSCG00000029683	1.01813	-0.0839748	0.31837	ENSSSCG00000029683
138	ENSSSCG00000008119	1.01774	0.103431	0.102496	KCNIP3	potassium voltage-gated channel interacting protein 3
139	ENSSSCG00000034767	1.01482	-0.0522442	0.689116	LAMA1	laminin subunit alpha 1
140	ENSSSCG00000010457	1.01478	-0.127707	0.65641	KIF20B	kinesin family member 20B
141	ENSSSCG00000008898	1.01179	0.236804	0.559424	HOPX	Sus scrofa HOP homeobox (HOPX), mRNA
142	ENSSSCG00000017063	1.01166	-0.070192	0.512491	SGCD	sarcoglycan delta
143	ENSSSCG00000017471	1.01117	-0.0122449	0.131533	CDC6	cell division cycle 6
144	ENSSSCG00000026478	1.00768	-0.737615	-0.664801	PADI2	peptidyl arginine deiminase 2
145	ENSSSCG00000035908	1.00275	0.130723	0.881604	HMGB3	high mobility group box 3
146	ENSSSCG00000035991	1.0012	-0.0315026	0.519835	CENPM	centromere protein M
147	ENSSSCG00000037562	1.00096	0.0106453	0.553443	SLC2A4RG	SLC2A4 regulator
148	ENSSSCG00000022398	1.0001	-0.0286211	0.745752	NUCKS1	nuclear casein kinase and cyclin dependent kinase substrate 1
149	ENSSSCG00000010629	0.18937	-0.787721	-1.44772	ADRA2A	Sus scrofa adrenoceptor alpha 2A (ADRA2A), mRNA
150	ENSSSCG00000022060	-0.205184	-0.538538	-1.34431	RASSF10	Ras association domain family member 10
151	ENSSSCG00000006719	-0.206099	-1.12172	-1.38018	HSD3B1	Sus scrofa hydroxy-delta-5-steroid dehydrogenase, 3 beta- and steroid delta-isomerase 1 (HSD3B1), mRNA
152	ENSSSCG00000023522	-0.502016	-0.50078	-1.03363	TGM2	transglutaminase 2
153	ENSSSCG00000017466	-0.630514	0.0585896	-1.01622	CCR7	C-C chemokine receptor type 7 precursor
154	ENSSSCG00000003481	-0.715233	-1.08816	-1.34539	PADI1	peptidyl arginine deiminase 1
155	ENSSSCG00000034297	-1.00069	-0.158286	-0.361268	HES2	hes family bHLH transcription factor 2
156	ENSSSCG00000030182	-1.00153	0.0824369	-0.282212	DEDD2	death effector domain containing 2
157	ENSSSCG00000018685	-1.00237	0.096646	-0.235053	SNORA68	Small nucleolar RNA SNORA68
158	ENSSSCG00000007465	-1.00313	-0.293671	-0.616324	B4GALT5	beta-1,4-galactosyltransferase 5
159	ENSSSCG00000032097	-1.00426	-0.25103	-0.433593	DUSP16	dual specificity phosphatase 16
160	ENSSSCG00000032436	-1.00429	-0.128367	-0.323172	LOC100626247	interferon-induced transmembrane protein 1-like
161	ENSSSCG00000032644	-1.00476	0.207312	0.0265075	HLX	H2.0 like homeobox
162	ENSSSCG00000038929	-1.00562	0.00896143	-0.642478	CEMIP	cell migration inducing hyaluronan binding protein
163	ENSSSCG00000015556	-1.00789	0.00295923	-0.536416	LAMC2	laminin subunit gamma 2
164	ENSSSCG00000004540	-1.00897	-0.374163	-0.485551	ONECUT2	one cut homeobox 2
165	ENSSSCG00000037483	-1.01018	-0.275833	-0.64371	RFTN2	raftlin family member 2
166	ENSSSCG00000017506	-1.01359	-0.228359	-0.163012	FBXL20	F-box and leucine rich repeat protein 20
167	ENSSSCG00000038965	-1.01371	0.394039	-0.128149	ARC	activity regulated cytoskeleton associated protein
168	ENSSSCG00000011010	-1.01509	-0.11375	-0.263792	C9orf72	chromosome 9 open reading frame 72
169	ENSSSCG00000039909	-1.01571	0.0125877	-0.586748	ICAM2	intercellular adhesion molecule 2 precursor
170	ENSSSCG00000009012	-1.01693	-0.104085	-0.322173	TMEM154	transmembrane protein 154
171	ENSSSCG00000016510	-1.02025	-0.320106	-0.0125212	UBN2	ubinuclein 2
172	ENSSSCG00000007866	-1.0206	0.00832792	-0.420323	TMC7	transmembrane channel like 7
173	ENSSSCG00000013545	-1.02304	0.103205	-0.285893	TUBB4A	tubulin beta 4A class Iva
174	ENSSSCG00000027030	-1.02542	0.0795432	-0.744887	BDKRB2	bradykinin receptor B2
175	ENSSSCG00000003805	-1.02572	-0.301244	-0.338531	PDE4B	phosphodiesterase 4B
176	ENSSSCG00000017416	-1.03017	-0.408531	-0.370041	DHX58	DExH-box helicase 58
177	ENSSSCG00000005946	-1.03228	-0.581034	-1.11392	WISP1	WNT1 inducible signaling pathway protein 1
178	ENSSSCG00000034044	-1.03255	0.169766	-0.497952	RASD1	ras related dexamethasone induced 1
179	ENSSSCG00000022714	-1.03487	0.0288641	-0.350846	OSER1	oxidative stress responsive serine rich 1
180	ENSSSCG00000035612	-1.03525	-0.00533301	-0.12167	COX6B2	cytochrome c oxidase subunit 6B2
181	ENSSSCG00000039751	-1.03705	-0.188981	-0.352875	NLRC5	NLR family CARD domain containing 5
182	ENSSSCG00000017754	-1.03772	-0.47746	-0.458468	LGALS9	galectin-9 isoform 1
183	ENSSSCG00000005211	-1.04015	-0.115899	-0.484152	CD274	CD274 molecule
184	ENSSSCG00000013835	-1.04124	-0.239765	-0.517924	CASP14	caspase 14
185	ENSSSCG00000009612	-1.0417	-0.299013	-1.09579	DOK2	docking protein 2
186	ENSSSCG00000016254	-1.04674	-0.142884	-0.462071	CCL20	C-C motif chemokine ligand 20
187	ENSSSCG00000008953	-1.04866	-0.0297043	-0.939774	CXCL8	Sus scrofa C-X-C motif chemokine ligand 8 (CXCL8), mRNA
188	ENSSSCG00000022492	-1.05198	-0.451441	-0.788675	AMPD3	adenosine monophosphate deaminase 3
189	ENSSSCG00000017886	-1.05315	-0.445582	-0.325316	FBXO39	F-box protein 39
190	ENSSSCG00000034721	-1.05664	0.0196093	-0.483212	ENSSSCG00000034721
191	ENSSSCG00000021443	-1.05668	0.129744	-0.287745	SGK1	serum/glucocorticoid regulated kinase 1
192	ENSSSCG00000005423	-1.05983	-0.43715	-0.120797	ABCA1	ATP-binding cassette, sub-family A (ABC1), member 1
193	ENSSSCG00000017251	-1.06001	-0.487508	-0.312203	SOX9	transcription factor SOX-9
194	ENSSSCG00000006173	-1.06103	-0.0193095	-0.319671	GDAP1	ganglioside induced differentiation associated protein 1
195	ENSSSCG00000017983	-1.06483	0.00222435	-0.402085	PER1	period circadian regulator 1
196	ENSSSCG00000040673	-1.06636	-0.241243	-0.419601	TMEM140	transmembrane protein 140
197	ENSSSCG00000027477	-1.06648	-0.385797	-0.605062	TBC1D2B	TBC1 domain family member 2B
198	ENSSSCG00000014618	-1.06699	-0.138975	-0.309347	LOC110255361	interferon-induced very large GTPase 1-like
199	ENSSSCG00000008835	-1.07078	-0.294695	-0.825308	RASL11B	RAS like family 11 member B
200	ENSSSCG00000005724	-1.07225	-0.259641	-0.28692	SETX	senataxin
201	ENSSSCG00000013360	-1.07262	-0.0104534	-0.371554	TMEM86A	transmembrane protein 86A
202	ENSSSCG00000001912	-1.07337	-0.318563	-0.254268	PML	promyelocytic leukemia
203	ENSSSCG00000014780	-1.07376	-0.101825	-0.367868	TRIM21	tripartite motif containing 21
204	ENSSSCG00000032715	-1.07554	-0.246528	-0.643729	CERS6	ceramide synthase 6
205	ENSSSCG00000012076	-1.07615	-0.373662	-0.297468	MX2	MX dynamin like GTPase 2
206	ENSSSCG00000024596	-1.07727	-0.191378	-0.369773	NOCT	nocturnin
207	ENSSSCG00000034870	-1.07763	-0.0627972	-1.02276	ODAPH	odontogenesis associated phosphoprotein
208	ENSSSCG00000008090	-1.07905	0.159111	-0.276761	IL1A	interleukin 1 alpha
209	ENSSSCG00000001841	-1.08566	-0.27669	-0.860998	RHCG	Rh family C glycoprotein
210	ENSSSCG00000033015	-1.08601	-0.346	-0.635078	B3GNT7	UDP-GlcNAc:betaGal beta-1,3-N-acetylglucosaminyltransferase 7
211	ENSSSCG00000017146	-1.08698	-0.49602	-0.424737	RNF213	ring finger protein 213
212	ENSSSCG00000007508	-1.08718	-0.308639	-0.319503	ZBP1	Sus scrofa Z-DNA binding protein 1 (ZBP1), mRNA
213	ENSSSCG00000032652	-1.0883	-0.440301	-0.170113	SLFN11	schlafen family member 11
214	ENSSSCG00000015649	-1.09291	-0.0641103	-0.400495	DYRK3	dual specificity tyrosine phosphorylation regulated kinase 3
215	ENSSSCG00000010219	-1.09302	-0.548067	-0.608999	ARID5B	AT-rich interaction domain 5B
216	ENSSSCG00000013382	-1.09564	-0.310191	-0.444918	PLEKHA7	pleckstrin homology domain containing A7
217	ENSSSCG00000031610	-1.09605	-0.0599047	-0.149008	ENSSSCG00000031610
218	ENSSSCG00000024800	-1.09665	-0.446756	-0.794295	DSC3	desmocollin 3
219	ENSSSCG00000022322	-1.09825	-0.435526	-0.192527	BCL2L11	BCL2 like 11
220	ENSSSCG00000027726	-1.09954	0.117533	-0.279937	DLL1	delta like canonical Notch ligand 1
221	ENSSSCG00000026985	-1.10272	-0.0234779	-1.23425	SNAP25	synaptosome associated protein 25
222	ENSSSCG00000031538	-1.10959	-0.15503	-0.82071	ANG	angiogenin
223	ENSSSCG00000004125	-1.11009	-0.202925	-0.459316	STX11	syntaxin 11
224	ENSSSCG00000000567	-1.11214	-0.31862	-0.284824	SOX5	SRY-box 5
225	ENSSSCG00000029226	-1.1127	0.0175269	-0.508724	ENSSSCG00000029226	Polyubiquitin-C Ubiquitin-related Ubiquitin
226	ENSSSCG00000030108	-1.1141	-0.228028	-0.300923	ZNFX1	zinc finger NFX1-type containing 1
227	ENSSSCG00000009031	-1.11463	-0.316657	-0.592304	EDNRA	endothelin receptor type A
228	ENSSSCG00000036340	-1.11471	-0.142269	-0.269421	ZBTB5	zinc finger and BTB domain containing 5
229	ENSSSCG00000005498	-1.11805	-0.424489	-0.695398	PAPPA	pappalysin 1
230	ENSSSCG00000011876	-1.12154	-0.283769	-0.261342	DTX3L	deltex E3 ubiquitin ligase 3L
231	ENSSSCG00000012853	-1.12261	-0.269086	-0.37141	IRF7	interferon regulatory factor 7
232	ENSSSCG00000011828	-1.12357	0.10307	-0.0449743	FAM43A	family with sequence similarity 43 member A
233	ENSSSCG00000011264	-1.12673	0.0680492	-0.24272	CSRNP1	cysteine and serine rich nuclear protein 1
234	ENSSSCG00000007554	-1.12961	0.242409	-0.415306	ZFAND2A	zinc finger AN1-type containing 2A
235	ENSSSCG00000036062	-1.13021	-0.0906388	-0.517155	RNF122	ring finger protein 122
236	ENSSSCG00000040575	-1.1318	-0.265007	-0.484118	ISG15	ubiquitin-like protein ISG15
237	ENSSSCG00000038569	-1.13287	0.195751	-0.223271	ARMCX1	armadillo repeat containing, X-linked 1
238	ENSSSCG00000017865	-1.13375	-0.0557787	-0.667939	CTNS	cystinosin, lysosomal cystine transporter
239	ENSSSCG00000009584	-1.13639	-0.305926	-0.544978	SEMA4D	semaphorin 4D
240	ENSSSCG00000033735	-1.13766	-0.0232275	-0.846195	PERM1	PPARGC1 and ESRR induced regulator, muscle 1
241	ENSSSCG00000033613	-1.13903	-0.264634	-0.29964	FOXS1	forkhead box S1
242	ENSSSCG00000008648	-1.1419	-0.217639	-0.407242	RSAD2	Sus scrofa radical S-adenosyl methionine domain containing 2 (RSAD2), mRNA
243	ENSSSCG00000013311	-1.14309	-0.0128915	-0.46622	KIAA1549L	KIAA1549 like
244	ENSSSCG00000011358	-1.14355	-0.08889	-0.423119	TREX1	three prime repair exonuclease 1
245	ENSSSCG00000037684	-1.14399	0.00877057	-0.858635	PDYN	prodynorphin
246	ENSSSCG00000015871	-1.14408	-0.858649	-0.780804	NR4A2	nuclear receptor subfamily 4 group A member 2
247	ENSSSCG00000039613	-1.1456	0.306592	-0.199342	SVIP	small VCP interacting protein
248	ENSSSCG00000035039	-1.14825	-0.23867	-0.115545	SNORD14	Small nucleolar RNA SNORD14
249	ENSSSCG00000009601	-1.1508	-0.273555	-0.712484	SLC18A1	solute carrier family 18 member A1
250	ENSSSCG00000014985	-1.15086	-0.243383	-1.11462	MMP3	Interstitial collagenase 18 kDa interstitial collagenase
251	ENSSSCG00000010330	-1.15115	-0.0773604	-0.528179	PPIF	peptidylprolyl isomerase F
252	ENSSSCG00000024973	-1.15319	-0.247421	-0.448479	GBP1	interferon-induced guanylate-binding protein 1
253	ENSSSCG00000038500	-1.15422	-0.0960589	-0.304069	TRIB1	tribbles pseudokinase 1
254	ENSSSCG00000017411	-1.15474	-0.213255	-0.781443	KCNH4	potassium voltage-gated channel subfamily H member 4
255	ENSSSCG00000010451	-1.15494	-0.223947	-0.256569	IFIT2	interferon induced protein with tetratricopeptide repeats 2
256	ENSSSCG00000032433	-1.15521	-0.430828	-0.535334	PTCHD1	patched domain containing 1
257	ENSSSCG00000039182	-1.15602	-0.224395	-0.997445	C11orf96	chromosome 11 open reading frame 96
258	ENSSSCG00000009881	-1.16713	-0.263455	-0.276572	OAS2	2'-5'-oligoadenylate synthetase 2
259	ENSSSCG00000033089	-1.1718	-0.151591	-0.220586	LOC110255360	interferon-induced very large GTPase 1-like
260	ENSSSCG00000020938	-1.17514	0.00647421	0.260514	SNORA31	Small nucleolar RNA SNORA31
261	ENSSSCG00000034802	-1.17753	-0.489643	-0.329593	RTP4	receptor transporter protein 4
262	ENSSSCG00000025836	-1.17937	-0.272199	-0.705065	SULT1C4	sulfotransferase family 1C member 4
263	ENSSSCG00000006543	-1.18908	-0.286873	-0.229078	ADAR	adenosine deaminase, RNA specific
264	ENSSSCG00000038521	-1.19247	-0.193573	-0.63622	CHAC1	ChaC glutathione specific gamma-glutamylcyclotransferase 1
265	ENSSSCG00000015897	-1.1945	-0.417363	-0.445837	IFIH1	interferon induced with helicase C domain 1
266	ENSSSCG00000032016	-1.19784	0.240014	-0.303442	ENSSSCG00000032016
267	ENSSSCG00000036274	-1.20172	0.0196429	-0.623211	UGT1A6	UDP glucuronosyltransferase 1 family, polypeptide A6 precursor
268	ENSSSCG00000031321	-1.20198	-0.628363	-0.912946	NR4A1	nuclear receptor subfamily 4 group A member 1
269	ENSSSCG00000003137	-1.20222	-0.193885	-0.408939	PLEKHA4	pleckstrin homology domain containing A4
270	ENSSSCG00000037452	-1.20673	-0.420426	-1.15763	HTR2A	5-hydroxytryptamine receptor 2A
271	ENSSSCG00000027992	-1.209	-0.386994	-0.523945	MST1R	macrophage stimulating 1 receptor
272	ENSSSCG00000036742	-1.20966	-0.411695	-0.602534	KLF15	Kruppel like factor 15
273	ENSSSCG00000034015	-1.21116	-0.234581	-0.553191	ENSSSCG00000034015
274	ENSSSCG00000024674	-1.21347	-0.769397	-0.155594	ABL2	ABL proto-oncogene 2, non-receptor tyrosine kinase
275	ENSSSCG00000027312	-1.2148	-0.643719	-0.508563	PTCH1	patched 1
276	ENSSSCG00000015335	-1.21725	0.101656	-0.42318	DYNC1I1	dynein cytoplasmic 1 intermediate chain 1
277	ENSSSCG00000010491	-1.21781	0.369608	-0.197053	ENSSSCG00000010491
278	ENSSSCG00000033830	-1.22269	0.312976	-0.0286995	CCDC8	coiled-coil domain containing 8
279	ENSSSCG00000035181	-1.22416	-0.608852	-0.516552	RNF24	ring finger protein 24
280	ENSSSCG00000030165	-1.22572	-0.163452	-0.630982	MAFF	MAF bZIP transcription factor F
281	ENSSSCG00000022925	-1.23033	-0.436683	-0.546829	SLC2A3	solute carrier family 2 member 3
282	ENSSSCG00000012173	-1.24164	-0.0854712	-0.646167	SAT1	Diamine acetyltransferase 1
283	ENSSSCG00000009911	-1.24311	0.19038	0.229547	ENSSSCG00000009911
284	ENSSSCG00000024881	-1.24503	-0.233959	-0.558919	TCP11L2	t-complex 11 like 2
285	ENSSSCG00000024108	-1.25126	0.215524	-0.0951115	SLC43A2	solute carrier family 43 member 2
286	ENSSSCG00000007140	-1.25883	-0.0136667	-0.479998	SMOX	spermine oxidase
287	ENSSSCG00000031356	-1.26043	0.53969	-0.131752	HES1	transcription factor HES-1
288	ENSSSCG00000036956	-1.26374	0.320887	-0.180705	SOCS3	suppressor of cytokine signaling 3
289	ENSSSCG00000023178	-1.26865	-0.308604	-0.462788	BATF2	basic leucine zipper ATF-like transcription factor 2
290	ENSSSCG00000009592	-1.27016	-0.148732	-0.429807	NFIL3	nuclear factor, interleukin 3 regulated
291	ENSSSCG00000030575	-1.27197	-0.242804	-1.15152	TMEM158	transmembrane protein 158 (gene/pseudogene)
292	ENSSSCG00000040815	-1.27557	0.0166988	-0.262119	DUSP5	dual specificity phosphatase 5
293	ENSSSCG00000040725	-1.27657	-0.436077	-0.857846	IL11	interleukin 11
294	ENSSSCG00000025715	-1.27848	-0.100875	-0.341484	SNORD15	Small nucleolar RNA SNORD15
295	ENSSSCG00000017700	-1.28199	-0.234255	-0.806188	CCL3L1	C-C motif chemokine 3-like 1 precursor
296	ENSSSCG00000030801	-1.29336	-0.184187	-0.357653	LOC100523310	guanylate-binding protein 6
297	ENSSSCG00000016991	-1.29374	-0.29724	-0.581238	DUSP1	dual specificity phosphatase 1
298	ENSSSCG00000007949	-1.29921	-0.104347	-0.570125	SRL	sarcalumenin
299	ENSSSCG00000011391	-1.30604	-0.149114	-0.597396	CDHR4	cadherin related family member 4
300	ENSSSCG00000036524	-1.31299	-0.0678862	-0.245553	ENSSSCG00000036524
301	ENSSSCG00000028562	-1.3154	0.168084	-0.40036	ENSSSCG00000028562
302	ENSSSCG00000014277	-1.3265	-0.0669361	-0.265191	IRF1	interferon regulatory factor 1
303	ENSSSCG00000027365	-1.33039	-0.21184	-0.827579	WNT7B	Wnt family member 7B
304	ENSSSCG00000034265	-1.33563	0.0447485	-0.549154	DESI1	desumoylating isopeptidase 1
305	ENSSSCG00000024633	-1.33771	0.378518	-0.468822	JAKMIP3	Janus kinase and microtubule interacting protein 3
306	ENSSSCG00000027378	-1.33873	-0.358612	-0.693606	SH3PXD2B	SH3 and PX domains 2B
307	ENSSSCG00000006987	-1.34536	-0.11901	-0.0204984	SLC7A2	solute carrier family 7 member 2
308	ENSSSCG00000020906	-1.35528	-0.268798	-0.253658	TNFSF10	TNF superfamily member 10
309	ENSSSCG00000026407	-1.35927	-0.217988	-0.942328	NCCRP1	non-specific cytotoxic cell receptor protein 1 homolog (zebrafish)
310	ENSSSCG00000027407	-1.36387	0.370453	-0.445826	MYH14	myosin heavy chain 14
311	ENSSSCG00000023010	-1.36878	-0.0782763	-0.938349	TMOD1	tropomodulin 1
312	ENSSSCG00000034972	-1.37102	-0.081984	-0.341942	CNIH3	cornichon family AMPA receptor auxiliary protein 3
313	ENSSSCG00000032691	-1.37386	-0.743648	-1.29373	ANKRD66	ankyrin repeat domain 66
314	ENSSSCG00000016986	-1.3765	-0.214377	-0.262009	CREBRF	CREB3 regulatory factor
315	ENSSSCG00000024071	-1.38164	-0.0406623	-0.894818	SCARF1	scavenger receptor class F member 1
316	ENSSSCG00000040162	-1.3838	-0.0599971	-0.699514	NUPR1	nuclear protein 1, transcriptional regulator
317	ENSSSCG00000000148	-1.38427	-0.160455	-0.44939	LOC106510284	apolipoprotein L3-like
318	ENSSSCG00000006588	-1.38956	0.318243	-0.233466	S100A9	S100 calcium binding protein A9
319	ENSSSCG00000040317	-1.39076	-0.368711	-0.604352	SOD2	superoxide dismutase
320	ENSSSCG00000009322	-1.39391	-0.110893	-0.532276	SLC46A3	solute carrier family 46 member 3
321	ENSSSCG00000037815	-1.41292	0.0109943	-0.326941	ZC3H12A	zinc finger CCCH-type containing 12A
322	ENSSSCG00000004154	-1.42074	-0.254981	-0.318552	TNFAIP3	TNF alpha induced protein 3
323	ENSSSCG00000003326	-1.434	0.134285	-0.364346	ENSSSCG00000003326
324	ENSSSCG00000008123	-1.44878	-0.0825623	-0.482076	ARID5A	AT-rich interaction domain 5A
325	ENSSSCG00000014016	-1.45083	0.0876339	-0.401464	SQSTM1	sequestosome 1
326	ENSSSCG00000009002	-1.46473	0.173821	-0.38899	TLR2	toll like receptor 2
327	ENSSSCG00000008712	-1.46766	-0.519572	-0.919628	PPP2R2C	protein phosphatase 2 regulatory subunit Bgamma
328	ENSSSCG00000036618	-1.46847	-0.195695	-0.735187	FCGR3A	low affinity immunoglobulin gamma Fc region receptor III precursor
329	ENSSSCG00000035998	-1.47309	-0.550095	-0.590937	C8H4orf54	chromosome 8 C4orf54 homolog
330	ENSSSCG00000011951	-1.48169	-0.433784	-0.349008	NFKBIZ	NFKB inhibitor zeta
331	ENSSSCG00000026043	-1.49496	-0.0434064	-0.721569	TGM3	transglutaminase 3
332	ENSSSCG00000018047	-1.5062	-0.103389	-0.617953	FAM83G	family with sequence similarity 83 member G
333	ENSSSCG00000011133	-1.51061	-0.231625	-0.556266	PFKFB3	6-phosphofructo-2-kinase/fructose-2,6-biphosphatase 3
334	ENSSSCG00000026454	-1.52028	0.0396285	-0.353492	ENSSSCG00000026454
335	ENSSSCG00000029438	-1.54487	0.074951	-0.268359	SESN2	sestrin 2
336	ENSSSCG00000028689	-1.55763	-0.0546298	-0.386841	SNORA71	Small nucleolar RNA SNORA71
337	ENSSSCG00000004572	-1.56439	0.0387064	-0.59341	C2CD4B	C2 calcium dependent domain containing 4B
338	ENSSSCG00000007499	-1.59212	-0.454287	-1.14589	TFAP2C	transcription factor AP-2 gamma
339	ENSSSCG00000011239	-1.59584	-0.35258	-0.336225	TRANK1	tetratricopeptide repeat and ankyrin repeat containing 1
340	ENSSSCG00000040036	-1.60397	-0.273228	-1.10682	ENSSSCG00000040036
341	ENSSSCG00000034763	-1.60843	-0.45592	-0.474516	IRS2	insulin receptor substrate 2
342	ENSSSCG00000031788	-1.60958	0.356354	-0.354347	PTAFR	platelet activating factor receptor
343	ENSSSCG00000023684	-1.61653	-0.238357	-0.235363	MT1A	Metallothionein-1A
344	ENSSSCG00000005385	-1.61681	-0.319342	-0.62374	NR4A3	nuclear receptor subfamily 4 group A member 3
345	ENSSSCG00000011298	-1.61889	-0.388556	-1.11054	CDCP1	CUB domain containing protein 1
346	ENSSSCG00000023737	-1.6834	-0.0671079	-1.03281	CSF2	granulocyte-macrophage colony-stimulating factor precursor
347	ENSSSCG00000035598	-1.69018	-0.195408	-0.356669	EDN1	endothelin-1 preproprotein
348	ENSSSCG00000013595	-1.69559	0.0256958	-0.820811	CERS4	ceramide synthase 4
349	ENSSSCG00000029507	-1.7254	-0.230812	-0.808215	RASGEF1B	RasGEF domain family member 1B
350	ENSSSCG00000013303	-1.76632	0.051254	-0.432973	ABTB2	ankyrin repeat and BTB domain containing 2
351	ENSSSCG00000038562	-1.77062	-0.0394389	-0.750591	RND1	Rho family GTPase 1
352	ENSSSCG00000025206	-1.77871	0.213517	-0.30245	RNF19B	ring finger protein 19B
353	ENSSSCG00000015595	-1.7845	0.0721338	-0.311374	ATF3	activating transcription factor 3
354	ENSSSCG00000017991	-1.86147	-0.376276	-0.914094	PIK3R5	phosphoinositide 3-kinase regulatory subunit 5
355	ENSSSCG00000004369	-1.86357	-0.391383	-0.87723	PRDM1	PR/SET domain 1
356	ENSSSCG00000031616	-1.88525	-0.300567	-0.64794	FOSB	FosB proto-oncogene, AP-1 transcription factor subunit
357	ENSSSCG00000004195	-1.89595	-0.461457	-0.569784	ARG1	arginase 1
358	ENSSSCG00000037735	-1.9303	-0.108496	-0.620793	HCAR2	hydroxycarboxylic acid receptor 2
359	ENSSSCG00000036933	-1.97477	-0.115095	-0.373957	NR1D1	nuclear receptor subfamily 1 group D member 1
360	ENSSSCG00000039416	-2.5419	-0.352127	-0.504084	CXCR4	C-X-C chemokine receptor type 4
