# Supplementary material for: The effects of 2,3,7,8-tetrachlorodibenzo-p-dioxin (TCDD) on the transcriptome of aryl hydrocarbon receptor (AhR) knock-down porcine granulosa cells
Source: PeerJ. 2020 Jan 22;8:e8371. doi: 10.7717/peerj.8371 (PMC6982409; doi:10.7717/peerj.8371)
Supplement: Table S7 [file peerj-08-8371-s008.xlsx]

## Sheet: Table S7
Supplemental Table 7. Differentially expressed genes identified both in the current study (AhR knock-down porcine granulosa cells treated with 2,3,7,8-tetrachlorodibenzo-p-dioxin [TCDD]) and in our previous study devoted to examining the TCDD effects in intact porcine granulosa cells
No.	Gene description	Gene Symbol	AhR knock-down AVG-16 cells	AVG-16 cells (Sadowska et al, 2017)
			The expression levels of genes in the cells treated with TCDD (log2 fold change)
1	DNA-binding protein inhibitor ID-1	ID1	1.12 (3h)	-1.11 (3h)
2	Nuclear receptor subfamily 4 group A member 2	NR4A2	-1.14 (3h)	-1.29 (24h)
3	Nuclear receptor subfamily 4 group A member 3	NR4A3	-1.61 (3h)	1.16 (3h)
4	Ankyrin repeat domain 1	ANKRD1	1.14 (3h)	-1.03 (3h)
5	MAF bZIP transcription factor F	MafF	-1.22 (3h)	1.26 (3h)
6	Rho family GTPase 1	RND1	-1.77 (3h)	2.54 (3h)
7	Cell migration inducing hyaluronan binding protein	CEMIP	-1.01 (3h)	1.38 (3h)
8	Gamma-aminobutyric acid type A receptor pi subunit	GABRP	1.09 (3h)	1.09 (24h)
			1.01 (24h)
9	Transcription factor SOX-9	SOX9	-1.06 (3h)	1.08 (3h)
10	Neuralized E3 ubiquitin protein ligase	NEURL1	1.05 (3h)	1.87 (3h)
11	Transmembrane protein 86A	TMEM86A	-1.07 (3h)	1.01 (3h)
12	C-C motif chemokine ligand 20	CCL20	-1.05 (3h)	-1.47 (24h)
13	Ring finger protein 19B	RNF19B	-1.78 (3h)	1.18 (3h)
